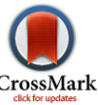

# *In Vivo* Time-Related Evaluation of a Therapeutic Neutralization Monoclonal Antibody against Lethal Enterovirus 71 Infection in a Mouse Model

Zhiqun Li<sup>1</sup>, Longfa Xu<sup>1,2</sup>, Delei He<sup>1,2</sup>, Lisheng Yang<sup>1</sup>, Che Liu<sup>1</sup>, Yixin Chen<sup>1,2</sup>, James Wai Kuo Shih<sup>1,2</sup>, Jun Zhang<sup>1,2</sup>, Qinjian Zhao<sup>1,2</sup>, Tong Cheng<sup>1,2\*</sup>, Ningshao Xia<sup>1,2\*</sup>

**1** State Key Laboratory of Molecular Vaccinology and Molecular Diagnostics, School of Life Sciences, Xiamen University, Xiamen Fujian, PR China, **2** National Institute of Diagnostics and Vaccine Development in infectious diseases, School of Public Health, Xiamen University, Xiamen Fujian, PR China

## Abstract

Enterovirus 71 (EV71) is a neurotropic virus capable of inducing severe neurological symptoms and death. No direct targeting antivirals are useful in the treatment of severe EV71 infection. Because of low toxicity and good specificity, monoclonal antibodies (MAB) are a potential candidate for the treatment of viral infections. Therefore, we developed an EV71-specific conformational MAB with high *in vitro* cross-neutralization activity to heterologous EV71 subgenotypes. The *in vivo* treatment experiment at different days post-infection indicated that a single treatment of MAB CT11F9 within day 3 post-infection fully protected mice from morbidity and mortality (0% PBS vs. 100% at 10 µg/g per body weight \*\*\*P<0.0001). Immunohistochemical and histological analysis confirmed that CT11F9 significantly prohibited EV71 VP1 expression in various tissues and prevented EV71-induced myonecrosis. Moreover, thrice-treatment at day 4, 5, 6 post-infection was associated with an increased survival rate (18.2% single vs. 50% thrice at 20 µg/g per body weight), and the mice recovered from limb paralysis. Competitive ELISA also confirmed that CT11F9-recognized epitopes were immunodominant in humans. In conclusion, MAB CT11F9 is an ideal candidate to be humanized and used in severe EV71 infection.

**Citation:** Li Z, Xu L, He D, Yang L, Liu C, et al. (2014) *In Vivo* Time-Related Evaluation of a Therapeutic Neutralization Monoclonal Antibody against Lethal Enterovirus 71 Infection in a Mouse Model. PLoS ONE 9(10): e109391. doi:10.1371/journal.pone.0109391

**Editor:** Ralph Tripp, University of Georgia, United States of America

**Received:** February 23, 2014; **Accepted:** September 10, 2014; **Published:** October 3, 2014

**Copyright:** © 2014 Li et al. This is an open-access article distributed under the terms of the Creative Commons Attribution License, which permits unrestricted use, distribution, and reproduction in any medium, provided the original author and source are credited.

**Funding:** This work was supported by National Science and Technology Major Project of the Ministry of Science and Technology of China (No. 2010ZX09401-403), National Natural Science Foundation of China (No. 30972826), and National Natural Science Fund for Distinguished Young Scholars (No. 30925030). The funders had no role in study design, data collection and analysis, decision to publish, or preparation of manuscript.

**Competing Interests:** The authors have declared that no competing interests exist.

\* Email: tcheng@xmu.edu.cn (TC); nsxia@xmu.edu.cn (NSX)

## Introduction

Enterovirus 71 (EV71), belonging to the genus Enterovirus of the family Picornaviridae, is one of the major causative pathogens of hand, foot and mouth disease (HFMD). Large outbreaks associated with EV71 have been reported worldwide, especially in Asian-Pacific countries, since 1997 [1–4]. Although most EV71 infections are self-limited and only cause mild symptoms, severe complications such as acute flaccid paralysis, encephalitis, pulmonary edema and death have been described [5]. EV71 has been regarded as the most important neurotropic enterovirus since the eradication of the poliovirus.

More than 25 MABs have been approved for clinical use for diseases such as cancer, autoimmunity and inflammation, as well as infectious disease [6]. It is possible that MAB may be an ideal therapy option for EV71 infection. Research has confirmed that a thrice-daily injection of 5.0 mg/mouse of the neutralization polyclonal antibody at 4 h and 1 and 2 days post-infection can fully protect mice from EV71-induced death [7]. Neutralization monoclonal antibody (nMAB) also had treatment effect: It has been shown that an EV71 MAB belonging to isotype IgM can provide 100% *in vivo* protection when it was administered at 10 µg/g of body weight to 2-week-old AG129 mice, which lack type I and II interferon receptors, one day prior to lethal EV71

challenge [8]. Single-treatment with an EV71-VP1 epitope-targeted nMAB (10 µg/g of body weight) at 1 day post-infection was also effective in preventing EV71-induced morbidity and mortality [9]. In our recent research, we have successfully protected mice from lethal EV71 challenge with an EV71-VP2 targeted nMAB at 1 day post-infection [10]. Although these data provide support for the effectiveness of neutralization antibody in the treatment of EV71 infection at early times of infection, there is a period of time in the host from the time of viral infection to the appearance of symptoms, which is a few days in a mouse model [11]. As reported, effective first-treatment time was limited within 24 h post-infection, and less is known about the comparative effect of different first-treatment times ranging from infection to death. In addition, death after onset of EV71-induced illness that rapidly progressed to severe cardiopulmonary failure has been observed [1,2,12], which suggests that it becomes much harder to treat the infection the closer the first-treatment time was to the onset of illness. Therefore, identifying the suitable time to begin antibody therapy and whether antibody therapy is effective in mice with mild or severe complications will provide important information as to the treatment potential of MAB to EV71 infection and will provide guidance for clinical therapeutic usage in EV71 infection.

In a previous study, we characterized a conformational MAB CT11F9 with *in vivo* neutralization activity [13]. In this study, we

further characterize the antibody's *in vivo* neutralization ability and competitive ability to human serum. The antibody's treatment effect under different treatment times and treatment frequencies after EV71 infection was tested, which highlighted the treatment potential of the nMAb in severe EV71 infection.

## Materials and Methods

### Ethics statement

All animal experiments were carried out in accordance with the guidelines of the Xiamen University Institutional Committee for the Care and Use of Laboratory Animals and were approved by the Xiamen University Laboratory Animal Management Ethics Committee. Written informed consent was obtained from the donor for use of the serum sample. Independent Ethics Committee approval was obtained from the Ethics Committee of the National Institute of Diagnostics and Vaccine Development in infectious diseases.

### Cells and viruses

Human muscular rhabdomyosarcoma (RD) cells were obtained from the American Type Culture Collection (ATCC) and cultivated in Minimal Essential Medium (MEM, GIBCO) supplemented with 10% FBS (GIBCO) plus L-glutamine, penicillin, and streptomycin. Eight EV71 clinical isolates were used (Table 1). Five Taiwan isolates and one prototype strain, BrCr/USA/1970, were sourced from the National Taiwan University; one genotype B3 strain, SK-EV006/Malaysia/1997, was sourced from the Tokyo Metropolitan Institute for Neuroscience of Japan; and the EV71/Jiangsu/2008 was isolated in Jiangsu Province. A mouse-adapted virus named pSVA-MP4 was generated by four passages in newborn mice using SK-EV006/Malaysia/1997. The EV71 virus was loaded onto a 15–50% continuous sucrose gradient, resulting in fractions with densities at 20–40% after 3 h of ultracentrifugation (32,000×g, SW41Ti rotor, Beckman). The fractions were collected, pelleted (100,000×g for 2 h) and resuspended in PBS. The protein content of the purified virus was measured by the BCA protein assay (Bio-Rad), and the samples were then stored in a –80°C freezer.

### Indirect immunofluorescence assay

RD cells were seeded overnight onto 24-well plates and then infected with EV71 Jiangsu. After incubating at 37°C for 12 h, the cells were fixed with 4% paraformaldehyde/PBS for 30 min followed by permeabilizing with 0.1% Triton/PBS for 10 min.

The cells were blocked with 4% FBS/PBS for 2 h at 37°C, incubated with MAb CT11F9 solution for 1 h at 37°C, and then incubated with FITC-coupled secondary antibodies for 30 min at 37°C, followed by incubating with DAPI for 5 min at room temperature. The cells were washed in PBS three times every 5 min. The results were observed using a Laser Scanning Confocal Microscope (MRC-1024, Biorad, Hercules, CA) with ZEN software.

### Competitive ELISA

Human serum was collected from HFMD patients between March and September 2008 during an outbreak of HFMD (Table 2). The clinical human serum samples used for this study were well characterized for the viral RNA and EV71 specific neutralization antibody titers in our previous work [14,15]. The 96-well plates were coated at 4°C overnight with EV71 Jiangsu in 50 mM carbonate buffer (pH 9.6). After washing with PBST (0.05% Tween 20 in PBS), the plates were blocked with 1% bovine serum albumin (BSA) in PBS at 37°C for 2 h. MAb CT11F9 (10 µg per well) or an well characterized anti-CB3 MAb A13H11 [16] (10 µg per well) was added and the plates were incubated for 30 min at 37°C. Human serum was added to the plates (1:50 dilution) and incubated at 37°C for 30 min. Mouse anti-human antibody labeled with horseradish peroxidase was added to the plates at a 1:200 dilution in PBS with 1% BSA, and incubated for 30 min at 37°C. The wells were washed 5 times with PBST between each step. Visualization was achieved by incubation with o-phenyl-diamine-2HCl for 15 min, and the reaction was stopped by adding 50 µl of 2 M H<sub>2</sub>SO<sub>4</sub>. The OD value (A<sub>450/620</sub>) was converted to percentage inhibition (PI) using the formula: PI (%) = 100 – [(OD<sub>sample</sub>/OD<sub>control</sub>) × 100]. The OD<sub>control</sub> represents the well containing human serum alone.

### *In vitro* neutralization assay

RD cell monolayers were prepared by seeding at 1,000 cells per well into 96-well plates. Two-fold serial dilutions of MAb CT11F9 (1 mg/ml) were prepared in MEM. Each sample was challenged with 100 TCID<sub>50</sub> EV71 strains shown in Table 1. After incubation at 37°C, 5% CO<sub>2</sub>, for 1 h, the serially diluted samples were incubated with RD cells prepared in 96-well plates and incubated at 37°C for 7 days. The neutralization titers were read as the highest dilution in over 50% CPE. Each assay was processed independently three times.

**Table 1.** Representative strains of EV71 subgenotypes.

| GenBank No. | Strain name                | Abbreviation | Genotype          |
|-------------|----------------------------|--------------|-------------------|
| U22521      | BrCr/USA/1970 <sup>a</sup> | BrCr         | EV71 A            |
| AB469182    | SK-EV006/Malaysia/1997     | EV006        | EV71 B3           |
| JF420549    | 02203/Taiwan/2002          | 02203        | EV71 B4           |
| JF420553    | 03315/Taiwan/2008          | 03315        | EV71 B5           |
| JF420552    | 03149/Taiwan/2008          | 03149        | EV71 C2           |
| FJ600325    | EV71/Jiangsu/2008          | Jiangsu      | EV71 C4           |
| JF420554    | 02969/Taiwan/2008          | 02969        | EV71 C5           |
| JF420555    | 00190/Taiwan/2008          | 00190        | CA16 <sup>b</sup> |

<sup>a</sup>Isolation place and isolation year are shown in the name of each virus.

<sup>b</sup>CA16, coxsackie virus A 16.

doi:10.1371/journal.pone.0109391.t001

**Table 2.** Information from the human serum samples collected from HFMD patients.

| Sera No. | PCR Assay |      | Neutralization Titers |      |
|----------|-----------|------|-----------------------|------|
|          | CA16      | EV71 | CA16                  | EV71 |
| 1        | –         | +    | 0                     | 1024 |
| 2        | –         | +    | 4096                  | 1024 |
| 3        | –         | +    | 0                     | 256  |
| 4        | –         | +    | 0                     | 512  |
| 5        | –         | +    | 32                    | 256  |
| 6        | –         | +    | 0                     | 2048 |
| 7        | –         | +    | 0                     | 2048 |
| 8        | –         | +    | 0                     | 2048 |

doi:10.1371/journal.pone.0109391.t002

### *In vivo* treatment of mice

Inbred pregnant BALB/c mice were obtained from the Slac Laboratory Animal Co., Ltd., Shanghai, China. The newborn mice were challenged intraperitoneally (i.p.) with 50  $\mu$ l of EV71 ( $10^7$  TCID<sub>50</sub> per mouse), followed by i.p. inoculated with 50  $\mu$ l of MAb CT11F9. For the single treatment, CT11F9 (10  $\mu$ g/g per body weight) was given at day 1, 2, 3, 4, or 5 post-infection. For the thrice-treatment, CT11F9 (20  $\mu$ g/g per body weight per day) was given at day 4, 5, 6 or 5, 6, 7 post-infection. The mice in the control groups were treated with 50  $\mu$ l of PBS. Every group (n = 10–11) contained two independent experiments. The mice were monitored daily for body weight, clinical illness and death until day 20 post-infection. The grade of clinical disease was scored as follows: 0, healthy; 1, lethargy and inactivity; 2, wasting; 3, limb weakness; 4, hind limb paralysis; and 5, moribund and death.

### Histology and immunohistochemistry analysis

Another two groups of newborn mice (6 newborn mice per group) were challenged i.p. with 50  $\mu$ l of EV71 ( $10^7$  TCID<sub>50</sub> per mouse). At day 3 post-infection, one group was given 50  $\mu$ l of CT11F9 (10  $\mu$ g/g per body weight) per mouse, the other group was given 50  $\mu$ l of PBS per mouse. Eight days after infection, the mice were euthanized using carbon dioxide and subjected to histopathological and immunohistochemical (IHC) examination. Brain, spinal cord, heart, liver, lung, intestines and limb muscles were separately harvested, and then fixed by immersion in 4% formalin/PBS for 72 h at room temperature. The fixed tissues were bisected, embedded in paraffin and sectioned (4 mm). For histopathological analysis, tissue sections were stained with hematoxylin and eosin (HE). IHC examinations were performed using an Ultrasensitive™ S-P kit (Fuzhou Maixin Biotechnology Development Co., Ltd., Fuzhou, China) and DAB Detection Kit (Streptavidin-Biotin; Fuzhou Maixin Biotechnology Development Co., Ltd., Fuzhou, China) according to the manufacturer's recommendations. The primary antibody, I2D7, was a mouse anti-EV71 VP1 MAb (1 mg/ml, 1:1,000 dilution).

### Statistical analysis

The survival curves were evaluated by the Mantel–Cox Log-rank test. The inhibition rate of the competitive ELISA was evaluated by the paired t-test. The health scores were shown as means. The competitive ELISA were shown as means  $\pm$  standard deviations (SD). A P value of  $<0.05$  was considered as statistical significance.

## Results

### *In vitro* cross-neutralizing ability of monoclonal antibody CT11F9

In a recent study, we identified a series of nMAbs that could not react with whole purified EV71 Jiangsu or VP1, VP2 and VP3 proteins of EV71 by western blotting, which indicated that they recognized conformational epitopes of EV71 [13]. Conformational MAb CT11F9, which had the highest *in vitro* neutralization titer, was selected to be further characterized. The laser-confocal results showed that CT11F9 specifically bound parental EV71 Jiangsu, mainly in the cytoplasm of RD cells (Fig. 1A). Detailed *in vitro* cross-neutralizing titers against seven EV71 strains covering the A, B3, B4, B5, C2, C4 and C5 subgenotypes showed that neutralization titers of more than 1:1028 were reached (Fig. 1B). According to these results, we felt that CT11F9 was a good candidate for testing in animals.

### *In vivo* single-treatment of CT11F9 in a time-related manner

To identify the influence of different treatment time on the morbidity and mortality of mice, groups of newborn BALB/c mice were infected i.p. with  $10^7$  TCID<sub>50</sub> of pSVA-MP4, followed by injection i.p. with CT11F9 at day 1, 2, 3, 4 or 5 post-infection (10  $\mu$ g/g of body weight, single-treatment). The control mice that received PBS developed illness as early as day 4 post-infection and progressed to limb paralysis from day 5 post-infection. The control mice died within day 9 post-infection, while all the mice that received CT11F9 by day 3 post-infection were healthy throughout the experiment. However, a single treatment at day 4 or 5 post-infection did not show a significant treatment effect (Fig. 2A).

To confirm the treatment effect of CT11F9 at day 3 post-infection, HE staining and IHC examinations were undertaken. The IHC results revealed the EV71-VP1 antigen in the medulla oblongata of the brain, and in limb muscles and intestines of PBS-treated mice, in contrast to CT11F9-treated mice (Fig. 2B). Severe necrotizing myositis was also observed in the limb muscles of PBS-treated mice compared to the normal morphology of CT11F9-treated mice by HE staining (Fig. 2B). These results show that a single treatment of MAb CT11F9 was able to fully protect mice from EV71-induced morbidity and mortality within day 3 post-infection, which was very close to the time when the mice began to present visible symptoms.

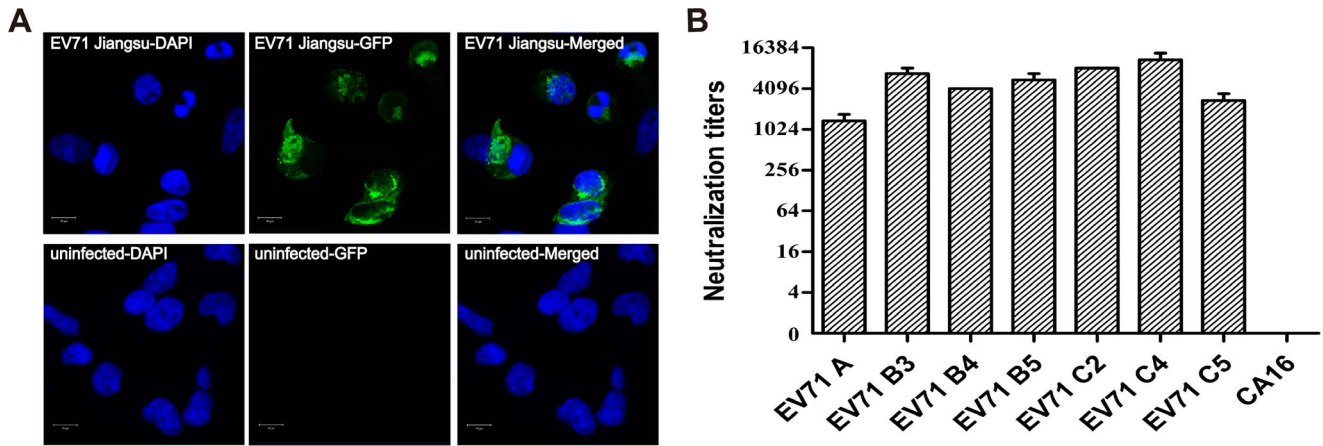

**Figure 1. Analysis of CT11F9 by immunofluorescence and an *in vitro* neutralization test.** (A) Immunofluorescence images of CT11F9 against EV71 Jiangsu-infected RD cells or uninfected RD cells are shown as DAPI, GFP and a merged image of DAPI and GFP, respectively. (B) Neutralization titers of MAb CT11F9 against seven EV71 subgenotypes and CA16. doi:10.1371/journal.pone.0109391.g001

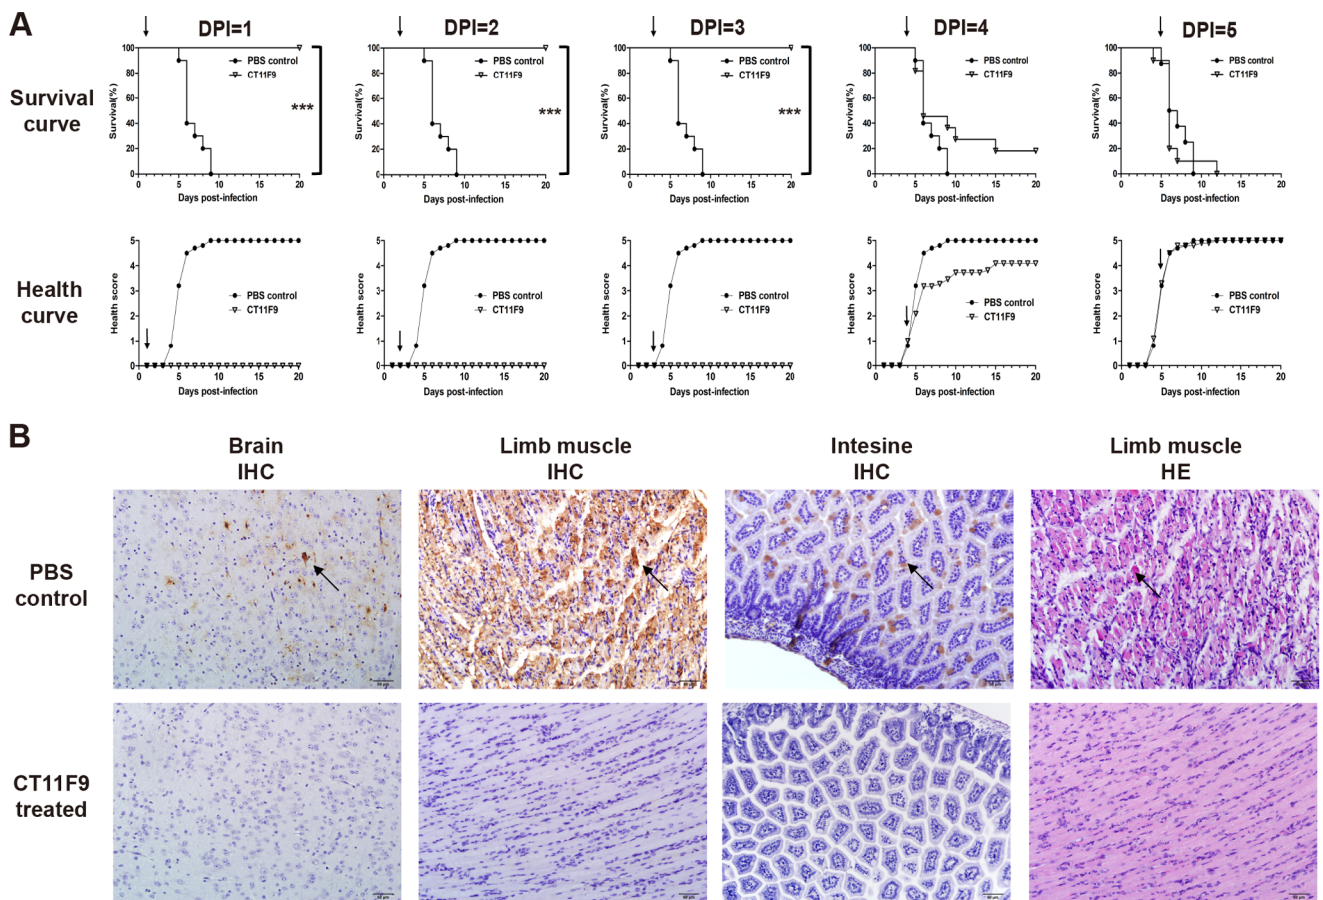

**Figure 2. *In vivo* single-treatment of CT11F9 at different times after infection with EV71.** (A) Kaplan-Meier survival curve and health scores of newborn BALB/c mice i.p. challenged with  $10^7$  TCID<sub>50</sub> pSVA-MP4 and then treated with MAb CT11F9 at different days post-infection (DPI). Deaths were scored as 5 until the end of the experiment; the treatment time is indicated by the black arrow. (B) Brain, limb muscle and intestine were analyzed by IHC; limb muscle was also analyzed by HE staining. Positive reactions are indicated by the black arrow. Representative images are shown at a magnification of 200X. The asterisks indicates significant differences of \*\*\* $P < 0.0001$ . doi:10.1371/journal.pone.0109391.g002

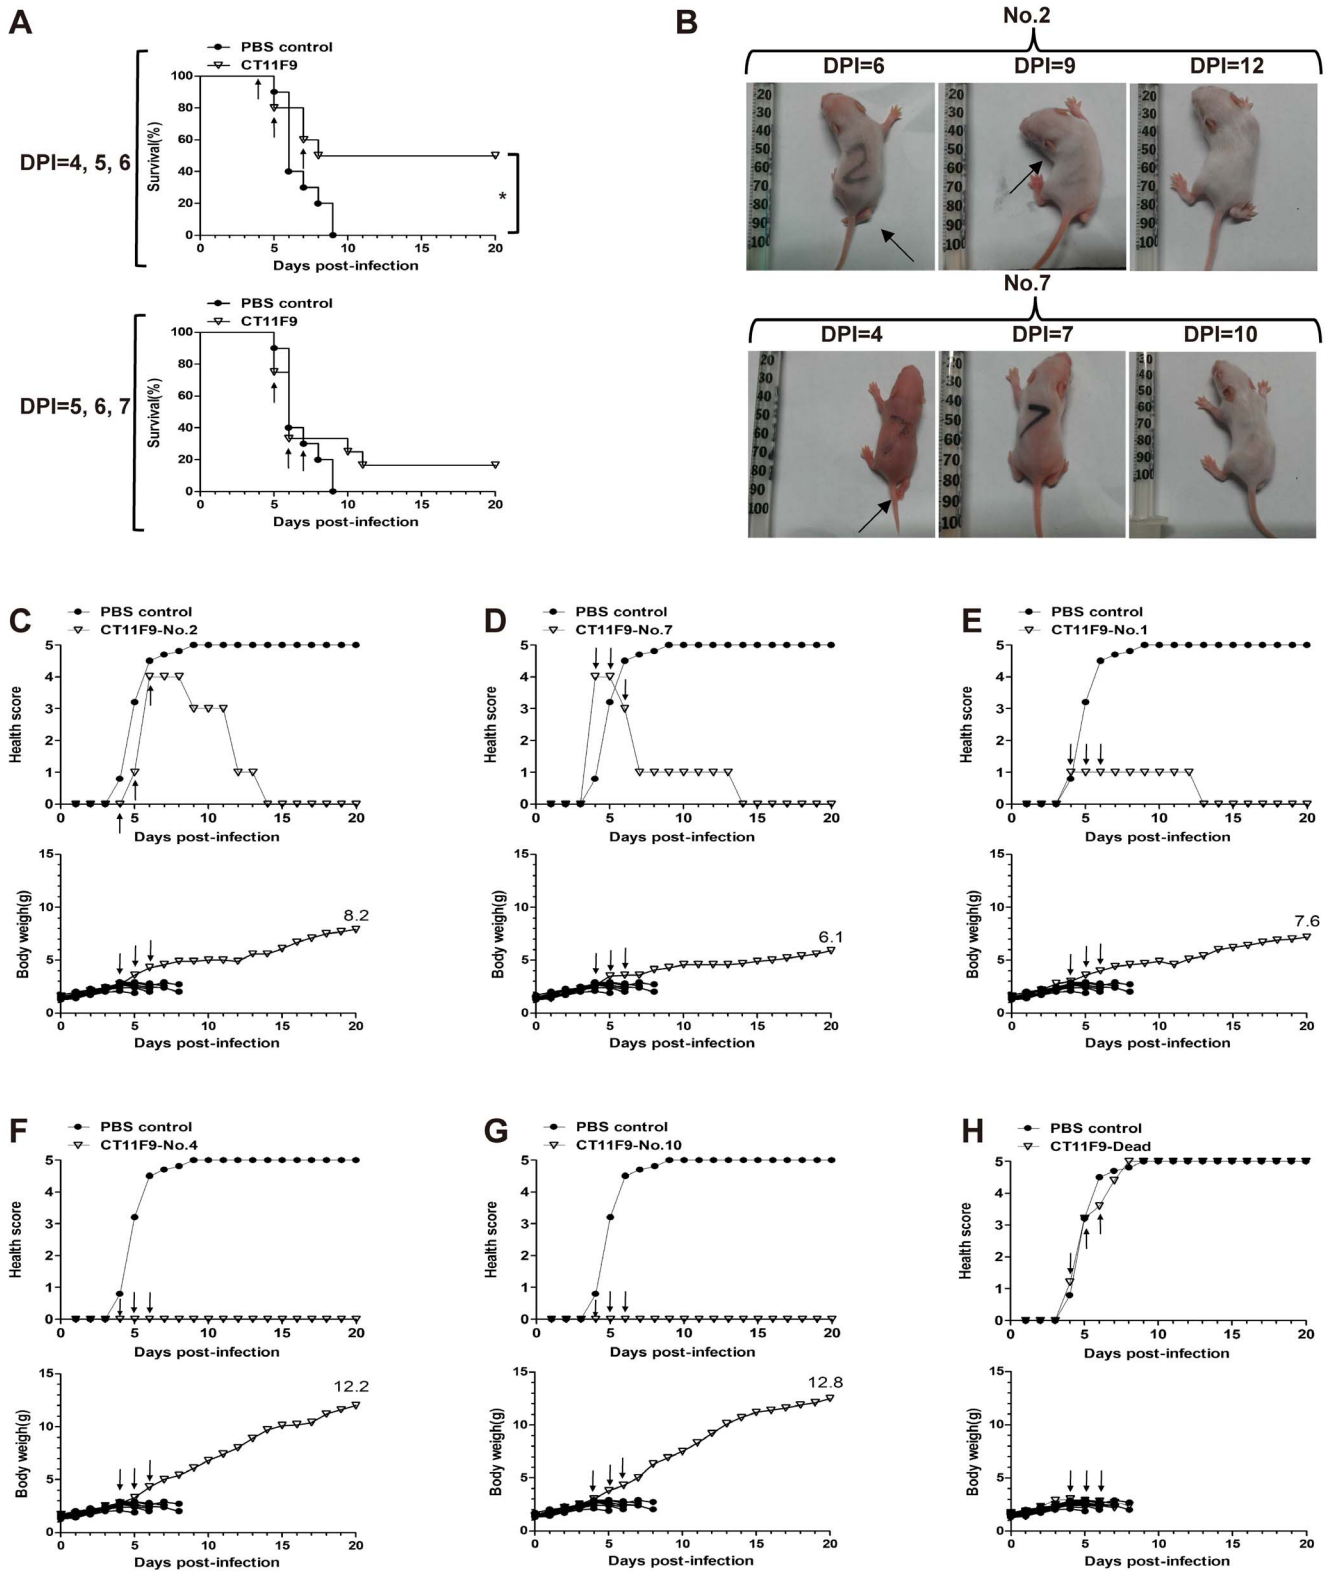

**Figure 3. *In vivo* thrice-treatment with CT11F9.** (A) Kaplan-Meier survival curve of newborn BALB/c mice (n = 10) i.p. challenged with  $10^7$  TCID<sub>50</sub> pSVA-MP4 and treated with MAb CT11F9 at days 4, 5, 6 or 5, 6, 7 post-infection. (B) Photographs of two mice recovered from severe limb paralysis from the day 4, 5, 6-treated group were taken on day 6, 9, 12 (No. 2) or 4, 7, 10 (No. 7) post-infection. The black arrow indicates limb paralysis (No. 2, DPI = 9; No. 7, DPI = 4) or curved body shape (No. 2, DPI = 9). (C-H) Health scores and body weight of mice from the day 4, 5, 6-treated group. In this group, (C-E) three mice recovered from illness, (F,G) two mice showed no symptoms, (H) the remaining five mice died. Deaths were scored as 5 until the end of the experiment and the body weight of each mouse is shown. The treatment time is indicated by the black arrow. The asterisks indicate significant differences of \*P<0.05. doi:10.1371/journal.pone.0109391.g003

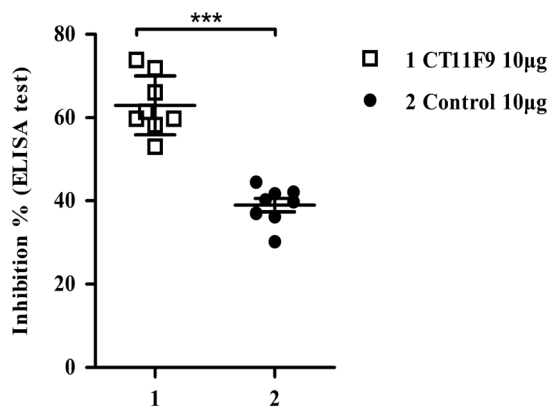

**Figure 4. Competitive ELISA of CT11F9 against human serum.** The MAb CT11F9 (10 µg/g) competed with eight human serum samples for specifically binding to EV71 Jiangsu coated on the well. The irrelevant MAb control was a CB3-VP1 targeted MAb. The MAb CT11F9 blocked 63% of EV71-infected human sera from binding EV71 Jiangsu. The asterisks indicates significant differences of  $***P < 0.0005$ . doi:10.1371/journal.pone.0109391.g004

### *In vivo* thrice-treatment of CT11F9

To achieve a significant treatment effect in morbid mice, an increase in treatment dose and frequency might be needed. For this reason, a continuous thrice-daily treatment on day 4, 5, 6 or day 5, 6, 7 post-infection (20 µg/g of body weight per day) was performed. Treatment begun at day 5 post-infection did not improve the survival rate, while treatment begun at day 4 post-infection increased the survival rate to 50% (Fig. 3A). Among the five surviving mice, two mice were healthy throughout the experiment (Fig. 3F and G). Three mice showed symptoms: two mice gradually recovered from limb paralysis, limb weakness or a curved body shape, lethargy and inactivity to normal status starting from day 4 or day 6 post-infection (Fig. 3B, C and D); the other mouse only showed lethargy and inactivity (Fig. 3E). These three mice had significantly lower body weights compared to the normal surviving mice in the same group (Fig. 3C, D, E, F and G). The remaining five mice died, similarly to the control group (Fig. 3H). Our results suggested that even when visible severe symptoms appeared, MAb CT11F9 had the ability to cure the illness, although some sequelae might occur.

### Competitive ELISA of CT11F9 against human sera

Protection in mice may not reflect a protective effect in humans. To further explore the potential of MAb CT11F9 in clinical therapy for human infection of EV71, eight human serum samples from EV71 infected patients confirmed by RT-PCR and neutralization assays were used to investigate the abundance of CT11F9-recognized epitopes to human serum by competitive ELISA. By calculating the mean PI values, the MAb CT11F9 have been shown to block 63% of EV71-infected human sera from binding EV71 Jiangsu, while the control group using an irrelevant anti-CB3 MAb showed 39% inhibition (Fig. 4). The significant difference of PI values ( $***P < 0.0005$ ) between CT11F9 and control indicated that CT11F9 recognized immunodominant epitopes in humans and is of potential in clinical therapy for EV71 infection.

### Discussion

EV71-induced severe complications and death make it urgent to develop effect antiviral drugs to prevent EV71-induced morbidity

and mortality. Although increasing numbers of anti-EV71 drugs have been reported, including small molecules and non-conventional nucleic-acid-based strategies [17], additional rigorous animal experiments or clinical tests are needed to determine their safety.

Neutralization antibodies play an important defensive role in viral infection. Although *in vivo* protection is complex because it involves the interaction of antibodies with cells and molecules of the innate immune system, most neutralization antibodies identified under defined experimental conditions also protect animals [18]. For example, passive transfer of specific nMAbs reduces virus-induced severity of Venezuelan equine encephalitis virus [19], West Nile virus (WNA) [20] and influenza virus [21,22]. In this study, we attempted to evaluate the potential of a neutralization antibody to treat EV71 infection and to identify the suitable time that antibody therapy may begin using a time-related treatment protocol in a mouse model, with different treatment times between the EV71 challenge to EV71-induced severe illness, which we thought was an important index for therapeutic antibodies. An optimal single-treatment time within day 3 post-infection was identified, after which the mice began to show visible illness. This was evidenced by the IHC and HE results from the brain, limb muscle and intestine in antibody-treated mice because EV71 may spread into the CNS through neural pathways to induce severe CNS complications [23,24]. These data supported the observation that injection of CT11F9 within day 3 post-infection effectively neutralized the virus *in vivo* and prevented the spread of EV71 into muscle tissues and CNS. Because antibodies cannot enter the cell cytoplasm, once the virus widely infects the cells of the CNS and limb muscle to cause tissue damage, most antibodies will not be able to clear the virus and reverse these symptoms. This may explain why single-treatment with CT11F9 failed to offer a noticeable treatment effect at day 4 or 5 post-infection when the challenged mice began to have slight complications or even paralysis. However, a thrice-treatment protocol with CT11F9 (20 µg/g per body weight) from day 4 post-infection successfully achieved a 50% survival rate, and the mice recovered from inactivity or even paralysis. These results indicate that optimal EV71 antibody therapy should be started before visible illness is observed and that a continuous treatment with a higher dose is needed once illness has occurred.

The lack of a suitable EV71 animal model has limited the understanding of EV71 pathogenesis and the development of EV71 therapeutic MAbs. Considering the aspects of ethics, economy and infectivity, a mouse model is more suitable for EV71 research and can be useful for seeking potential therapeutic MAbs although we have no ideal about the similarity of the EV71 progression between mouse and human. The *in vivo* result have showed that the MAb CT11F9 was of good treatment effect in mouse model. Nonetheless, it is important and necessary to humanized the MAb CT11F9 and evaluate it's treatment effect in a more suitable animal model when it becomes possible.

Anti-inflammatory MAbs is willing to be a good therapeutic choise for EV71 infection. Besides the virus-induced pathogenicity, it has been proposed that the induction of proinflammatory cytokines is responsible for the pathogenicity of EV71 [25–27]. Animal experiments have also confirmed that the injection of anti-IL-6 antibodies increases the survival rate of EV71-infected mice [28]. Considering of this, EV71 therapy is not only clearance of the virus but also restoration of the body immune reaction. Thus, combinations of anti-virus nMAbs with anti-inflammatory MAbs may be a good choice to be tested for further animal treatment experiments.

In conclusion, based on the *in vitro* cross-neutralization ability against different EV71 subgenotypes and the *in vivo* treatment effect in morbid mice, an EV71-specific nMAb CT11F9 that recognized immunodominant epitopes in humans is a promising candidate to be humanized and used in clinical therapy for EV71 infection.

## References

- Chan LG, Parashar UD, Lye MS, Ong FG, Zaki SR, et al. (2000) Deaths of children during an outbreak of hand, foot, and mouth disease in sarawak, malaysia: clinical and pathological characteristics of the disease. For the Outbreak Study Group. *Clin Infect Dis* 31: 678–683.
- Ho M, Chen ER, Hsu KH, Twu SJ, Chen KT, et al. (1999) An epidemic of enterovirus 71 infection in Taiwan. *Taiwan Enterovirus Epidemic Working Group. N Engl J Med* 341: 929–935.
- Chan KP, Goh KT, Chong CY, Teo ES, Lau G, et al. (2003) Epidemic hand, foot and mouth disease caused by human enterovirus 71, Singapore. *Emerg Infect Dis* 9: 78–85.
- Yang F, Ren L, Xiong Z, Li J, Xiao Y, et al. (2009) Enterovirus 71 outbreak in the People's Republic of China in 2008. *J Clin Microbiol* 47: 2351–2352.
- Solomon T, Lewthwaite P, Perera D, Cardoso MJ, McMinn P, et al. (2010) Virology, epidemiology, pathogenesis, and control of enterovirus 71. *Lancet Infect Dis* 10: 778–790.
- Chan AC, Carter PJ (2010) Therapeutic antibodies for autoimmunity and inflammation. *Nat Rev Immunol* 10: 301–316.
- Cao RY, Han JF, Jiang T, Tian X, Yu M, et al. (2011) In vitro and in vivo characterization of a new enterovirus type 71-specific human intravenous immunoglobulin manufactured from selected plasma donors. *J Clin Virol* 51: 246–249.
- Lim XF, Jia Q, Khong WX, Yan B, Premanand B, et al. (2012) Characterization of an isotype dependent monoclonal antibody against linear neutralizing epitope effective for prophylaxis of enterovirus 71 infection. *PLoS One* 7: e29751.
- Chang GH, Luo YJ, Wu XY, Si BY, Lin L, et al. (2010) Monoclonal antibody induced with inactivated EV71-Hn2 virus protects mice against lethal EV71-Hn2 virus infection. *Virol J* 7: 106.
- Xu L, He D, Li Z, Zheng J, Yang L, et al. (2014) Protection against Lethal Enterovirus 71 Challenge in mice by a Recombinant Vaccine Candidate Containing a Broadly Cross-Neutralizing Epitope within the VP2 EF Loop. *Theranostics* 4: 498–513.
- Wang YF, Chou CT, Lei HY, Liu CC, Wang SM, et al. (2004) A mouse-adapted enterovirus 71 strain causes neurological disease in mice after oral infection. *J Virol* 78: 7916–7924.
- Lum LC, Wong KT, Lam SK, Chua KB, Goh AY, et al. (1998) Fatal enterovirus 71 encephalomyelitis. *J Pediatr* 133: 795–798.
- Chen Y, Li C, He D, Cheng T, Ge S, et al. (2013) Antigenic analysis of divergent genotypes human Enterovirus 71 viruses by a panel of neutralizing monoclonal antibodies: current genotyping of EV71 does not reflect their antigenicity. *Vaccine* 31: 425–430.
- Xu F, Yan Q, Wang H, Niu J, Li L, et al. (2010) Performance of detecting IgM antibodies against enterovirus 71 for early diagnosis. *PLoS One* 5: e11388.
- Xu F, He D, He S, Wu B, Guan L, et al. (2011) Development of an IgM-capture ELISA for Cocksackievirus A16 infection. *J Virol Methods* 171: 107–110.
- Yang L, He D, Tang M, Li Z, Liu C, et al. (2014) Development of an enzyme-linked immunosorbent spot assay to measure serum-neutralizing antibodies against coxsackievirus B3. *Clin Vaccine Immunol* 21: 312–320.
- Wu KX, Ng MM, Chu JJ (2010) Developments towards antiviral therapies against enterovirus 71. *Drug Discov Today* 15: 1041–1051.
- Reading SA, Dimmock NJ (2007) Neutralization of animal virus infectivity by antibody. *Arch Virol* 152: 1047–1059.
- Hunt AR, Bowen RA, Frederickson S, Maruyama T, Roehrig JT, et al. (2011) Treatment of mice with human monoclonal antibody 24 h after lethal aerosol challenge with virulent Venezuelan equine encephalitis virus prevents disease but not infection. *Virology* 414: 146–152.
- Smeraski CA, Siddharthan V, Morrey JD (2011) Treatment of spatial memory impairment in hamsters infected with West Nile virus using a humanized monoclonal antibody MGAWN1. *Antiviral Res* 91: 43–49.
- He F, Kumar SR, Syed Khader SM, Tan Y, Prabakaran M, et al. (2013) Effective intranasal therapeutics and prophylactics with monoclonal antibody against lethal infection of H7N7 influenza virus. *Antiviral Res* 100: 207–214.
- Zheng Q, Xia L, Wu WL, Zheng Z, Huo Y, et al. (2011) Properties and therapeutic efficacy of broadly reactive chimeric and humanized H5-specific monoclonal antibodies against H5N1 influenza viruses. *Antimicrob Agents Chemother* 55: 1349–1357.
- Chen CS, Yao YC, Lin SC, Lee YP, Wang YF, et al. (2007) Retrograde axonal transport: a major transmission route of enterovirus 71 in mice. *J Virol* 81: 8996–9003.
- Ong KC, Badmanathan M, Devi S, Leong KL, Cardoso MJ, et al. (2008) Pathologic characterization of a murine model of human enterovirus 71 encephalomyelitis. *J Neuropathol Exp Neurol* 67: 532–542.
- Lin TY, Chang LY, Huang YC, Hsu KH, Chiu CH, et al. (2002) Different proinflammatory reactions in fatal and non-fatal enterovirus 71 infections: implications for early recognition and therapy. *Acta Paediatr* 91: 632–635.
- Wang SM, Lei HY, Yu CK, Wang JR, Su IJ, et al. (2008) Acute chemokine response in the blood and cerebrospinal fluid of children with enterovirus 71-associated brainstem encephalitis. *J Infect Dis* 198: 1002–1006.
- Wang SM, Lei HY, Huang KJ, Wu JM, Wang JR, et al. (2003) Pathogenesis of enterovirus 71 Brainstem encephalitis in pediatric patients: roles of cytokines and cellular immune activation in patients with pulmonary edema. *J Infect Dis* 188: 564–570.
- Khong WX, Foo DG, Trasti SL, Tan EL, Alonso S (2011) Sustained high levels of interleukin-6 Contribute to the pathogenesis of enterovirus 71 in a neonate mouse model. *J Virol* 85: 3067–3076.

## Author Contributions

Conceived and designed the experiments: NSX TC ZQL. Performed the experiments: ZQL LFX DLH LSY CL. Analyzed the data: NSX ZQL TC. Contributed reagents/materials/analysis tools: NSX JWKS JZ QJZ YXC. Wrote the paper: ZQL TC.
